# Supplementary material for: Curing kinetics of phenolphthalein based polyphosphazene towards thermal stability and flame retardancy of polybenzoxazine
Source: Royal Society of Chemistry journal article supplement (doi:10.1039/c9ra06857k), 2019-01-01
Supplement: c9ra06857k1.pdf [file c9ra06857k1.pdf]

## Supporting information

### Curing kinetics of phenolphthalein based polyphosphazene towards thermal stability and flame retardancy of polybenzoxazine

Ling Zhao<sup>a</sup>, Chunxia Zhao<sup>a\*</sup>, Min Wu<sup>a</sup>, Yuntao Li<sup>a,b\*\*</sup>, Hui Li<sup>a</sup>, Dong Xiang<sup>a</sup>, Cuicui Guo<sup>a</sup>

<sup>a</sup>*School of Materials and Engineering, Southwest Petroleum University, Chengdu 610500, China*

<sup>b</sup>*State Key Lab of Oil and Gas Reservoir Geology and Exploitation, Southwest Petroleum University, Chengdu 610050, China*

**Abstract** Phenolphthalein type polyphosphazene (PZPT) microspheres were synthesized by ultrasonic assisted precipitation polymerization method, and their structures were confirmed by scanning electron microscopy (SEM) and Fourier transform infrared (FTIR) spectroscopy. Benzoxazine/PZPT (Ba/PZPT) hybrid materials were fabricated and cured to prepare polybenzoxazine/PZPT (PBa/PZPT) composites. The effects of PZPT microspheres on the curing kinetics and behaviors of Ba were systematically analyzed and supported by differential scanning calorimetry (DSC) and *in-situ* FTIR. The thermogravimetric (TGA) results demonstrated good thermal stability of the PBa composites incorporating PZPT. The peak of heat release rate and total heat release values of PBa/PZPT-5% composites obviously decreased by 57.8% and 17.3% compared to those of the pristine PBa. Moreover, the smoke released from the PZPT/PBa system significantly reduced with the loading of microspheres. Finally, the dynamical mechanical analysis results demonstrated that the  $T_g$  of PBa flame retardant composites was approximately 210 °C, not affecting further applications of PBa composites.

Table S1 The curing characteristic parameters of Ba and Ba/PZPT systems at a heating rate of 5 °C/min

| Samples | $T_i$ (°C) | $T_p$ (°C) | $T_f$ (°C) | $\Delta T$ (°C) |
|---------|------------|------------|------------|-----------------|
|---------|------------|------------|------------|-----------------|

|            |     |     |     |    |
|------------|-----|-----|-----|----|
| Ba         | 231 | 237 | 243 | 12 |
| Ba/PZPT-1% | 221 | 233 | 241 | 20 |
| Ba/PZPT-3% | 206 | 220 | 235 | 29 |
| Ba/PZPT-5% | 200 | 216 | 237 | 37 |

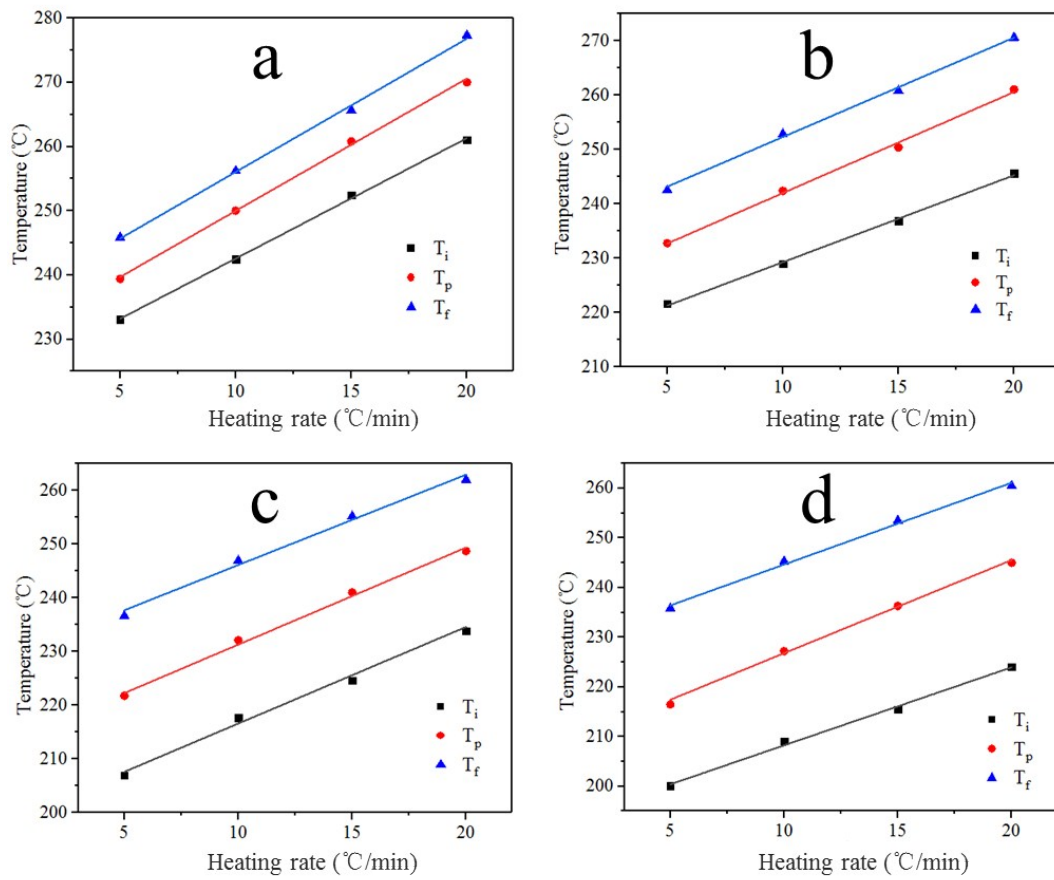

Fig. S1  $T_i$ ,  $T_p$ , and  $T_f$  versus  $\beta$  at different heating rates of 5, 10, 15, 20 °C/min of Ba (a), Ba/PZPT-1% (b), Ba/PZPT-3% (c), and Ba/PZPT-5%(d).

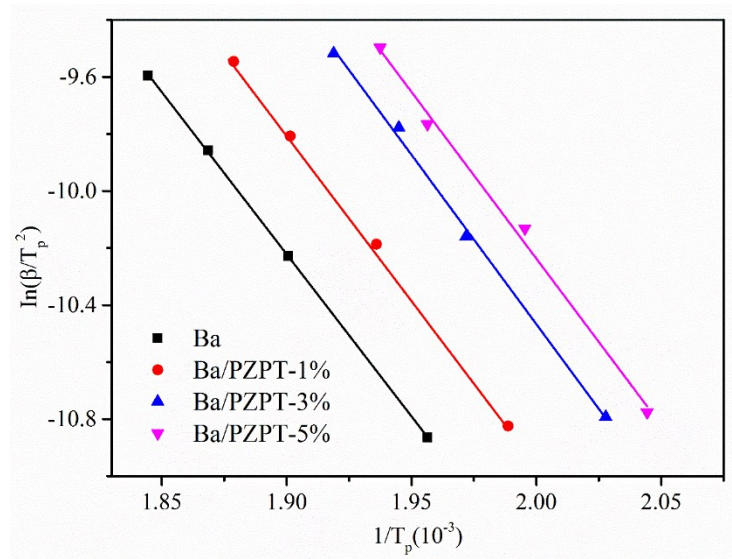

Fig. S2 Calculated kinetic parameters of the Ba and Ba/PZPT systems by the Kissinger method.

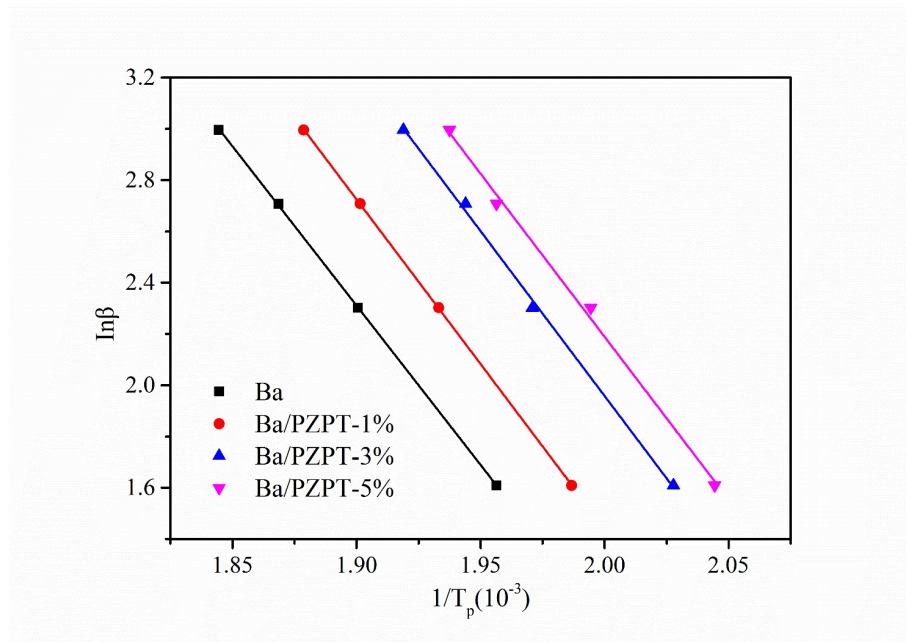

Fig. S3 Calculated kinetic parameters of the Ba and Ba/PZPT systems by the Ozawa method.
